# Supplementary material for: Sensitive determination of malondialdehyde in rat prostate by high performance liquid chromatography with fluorescence detection
Source: PubMed Central journal article supplement (PMC7055245; doi:10.1038/s41598-020-61074-3), 2020-03-04
Supplement: 41598_2020_61074_MOESM1_ESM.pdf [file 41598_2020_61074_MOESM1_ESM.pdf]

## **Supplementary information**

### **Title**

**Sensitive determination of malondialdehyde in rat prostate by high performance liquid chromatography with fluorescence detection**

Xiuli Dong · Jiayuan Tang · Xiangming Chen

School of Pharmacy, Binzhou Medical University, Yantai, 264003, China.

Correspondence and requests for materials should be addressed to C.X. (email: xmch913@163.com)

# Supplement Fig. 1

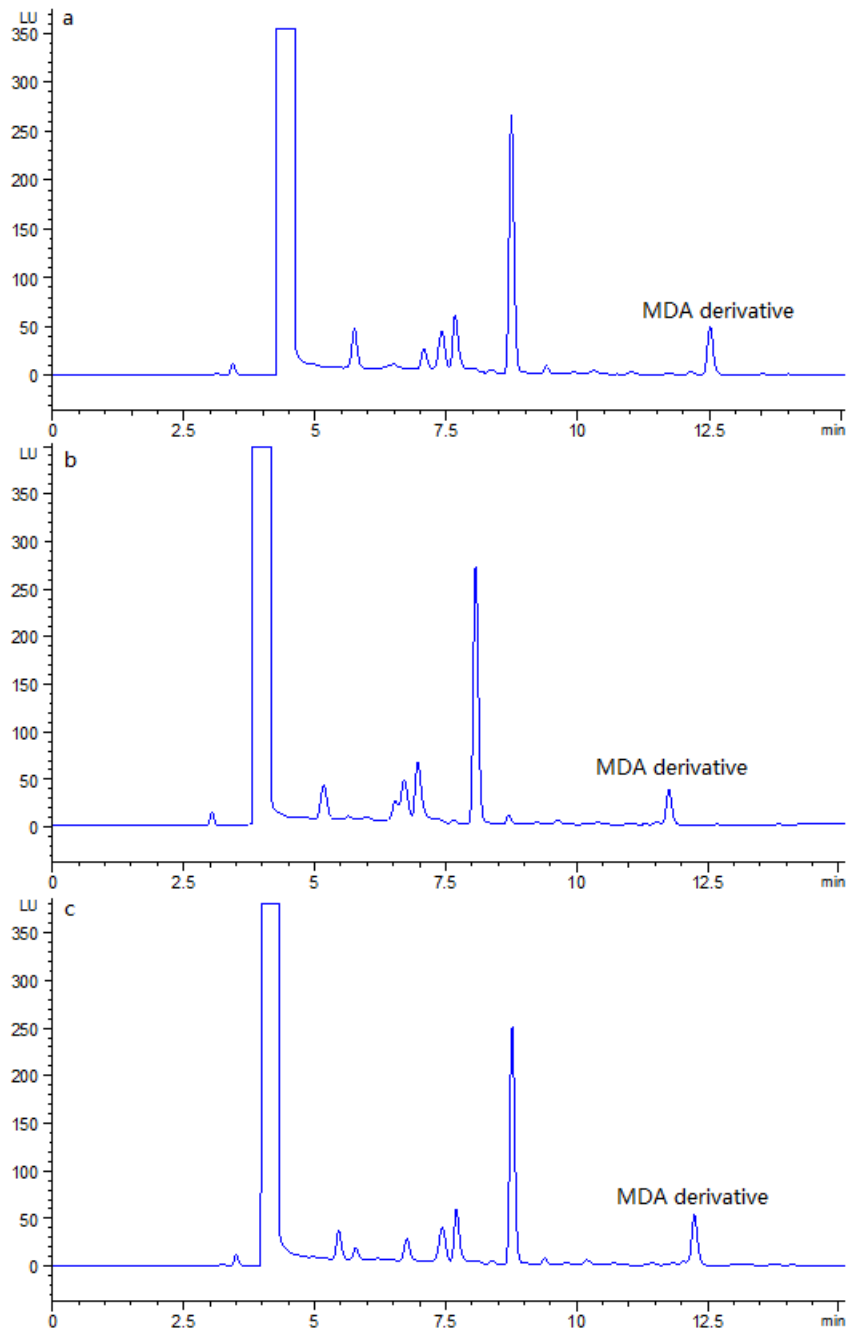

## **Supplementary Figure caption**

Supplement Figure 1. The chromatograms of three columns at the same chromatographic conditions. (a) ZORBAX SB-C18 column; (b) Eclipse XDB C18 column; (c) Eclipse Plus C18 column.
